# Supplementary material for: Flexible polybenzoxazine thermosets with high glass transition temperatures and low surface free energies
Source: Royal Society of Chemistry journal article supplement (doi:10.1039/c2py00449f), 2012-01-01
Supplement: c2py00449f.pdf [file c2py00449f.pdf]

## Supporting information

# Polybenzoxazine thermosets with high $T_g$ , flexibility, and low surface free energy

Ching Hsuan Lin,<sup>†\*</sup> Ting Yi Shen,<sup>†</sup> Yu Sin Shih,<sup>†</sup> Hong Tze Lin,<sup>†</sup> Sheng Lung Chang,<sup>†</sup> and Chih Feng Wang<sup>†\*</sup>

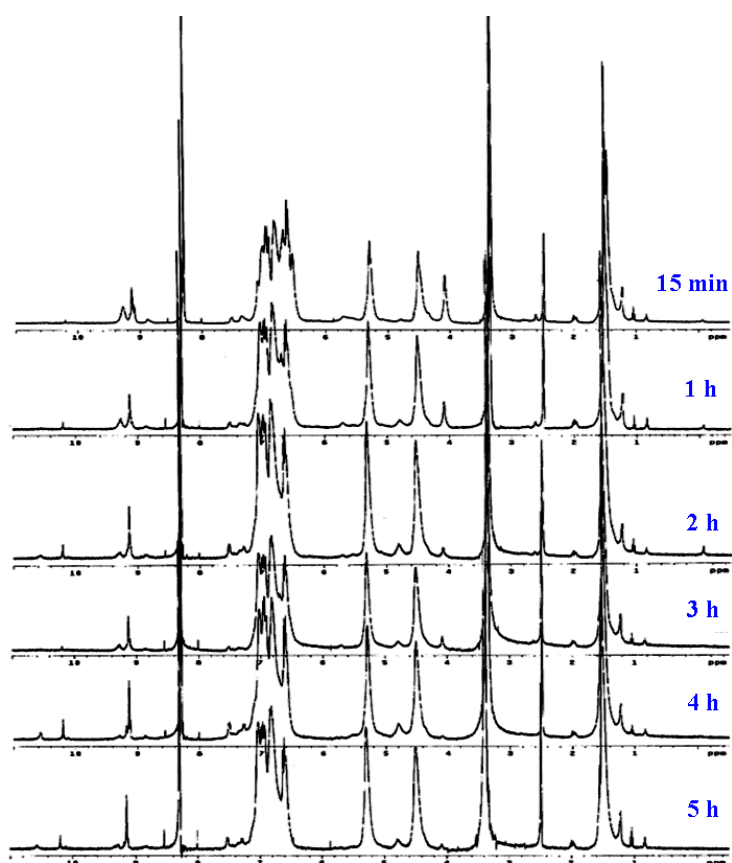

Figure S1. NMR spectra of methanol-precipitated reaction mixture at various periods of reaction time for P(B-oda) synthesis in chloroform

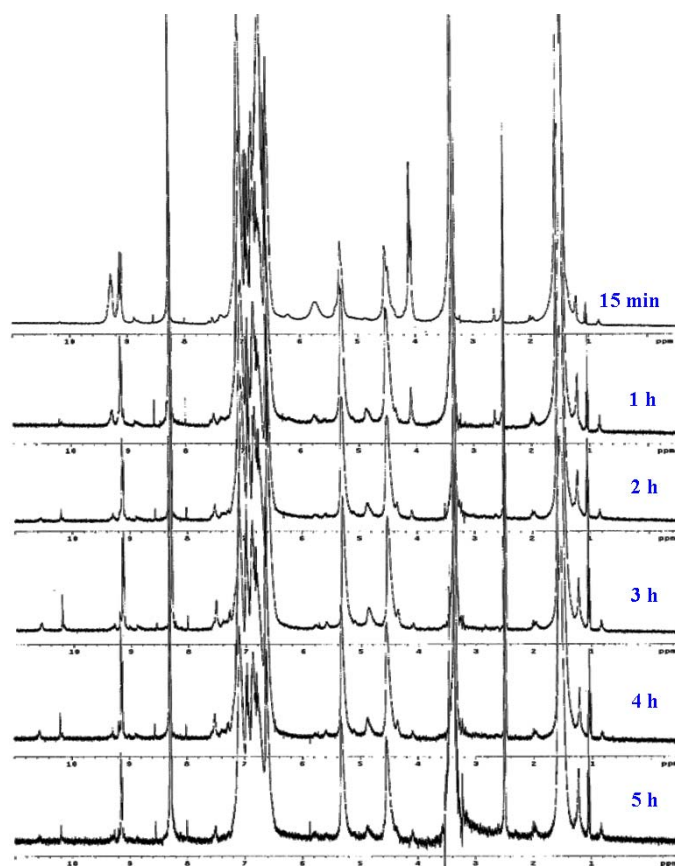

Figure S2. NMR spectra of methanol-precipitated reaction mixture at various periods of reaction time for P(B-bapp) synthesis in chloroform
